# Supplementary material
Source: PubMed Central journal article supplement (PMC7400208)
Supplement: jamapediatr-e202209-s001.pdf [file jamapediatr-e202209-s001.pdf]

## Supplementary Online Content

Marin JR, Rodean J, Hall M, et al. Trends in Use of Advanced Imaging in Pediatric Emergency Departments, 2009-2018. *JAMA Pediatr*. Published online August 3, 2020.  
doi:10.1001/jamapediatrics.2020.2209

**eTable 1.** Proportions of Encounters With Advanced Imaging by Disposition

**eTable 2.** Multivariable Model of Factors Associated With Emergency Department Advanced Imaging Studies

**eTable 3.** Frequency of Advanced Imaging, Admission, and Proportions of Total ED Visits for the 8 APR-DRGs

**eTable 4.** Ten Most Frequent ICD-9 and ICD-10 Codes as Principal Diagnosis for the 8 APR-DRGs

**eTable 5.** Multivariable Model of Factors Associated With Secondary Outcome Measures for the 8 APR-DRGs

**eFigure 1.** Hospital-Specific Changes in CT Imaging Overall and for Each of the 8 APR-DRGs Comparing 2009-2013 to 2014-2018

**eFigure 2.** Trends in Secondary Outcome Measures 2009-2018 for the 8 DRGs

This supplementary material has been provided by the authors to give readers additional information about their work.

**eTable 1.** Proportions of Encounters with Advanced Imaging by Disposition

|                                | ED visits          |                    |             | CT        |           |             | US        |           |             | MRI       |           |             | Any advanced imaging |           |             |
|--------------------------------|--------------------|--------------------|-------------|-----------|-----------|-------------|-----------|-----------|-------------|-----------|-----------|-------------|----------------------|-----------|-------------|
|                                | 2009<br>%<br>total | 2018<br>%<br>total | %<br>change | 2009<br>% | 2018<br>% | %<br>change | 2009<br>% | 2018<br>% | %<br>change | 2009<br>% | 2018<br>% | %<br>change | 2009<br>%            | 2018<br>% | %<br>change |
| Total<br>(n = 26,082,062)      |                    |                    |             | 3.9       | 2.9       | <b>-1.0</b> | 2.5       | 5.8       | <b>3.3</b>  | 0.3       | 0.6       | <b>0.3</b>  | 6.4                  | 8.7       | <b>2.3</b>  |
| Discharged<br>(n = 23,236,597) | 89.1               | 88.9               | <b>-0.2</b> | 2.7       | 2.0       | <b>-0.8</b> | 1.5       | 4.5       | <b>2.9</b>  | 0.1       | 0.3       | <b>0.2</b>  | 4.3                  | 6.4       | <b>2.2</b>  |
| Admitted<br>(n = 2,845,465)    | 10.9               | 11.1               | <b>0.2</b>  | 13.2      | 10.4      | <b>-2.8</b> | 10.7      | 16.9      | <b>6.2</b>  | 2.6       | 3.6       | <b>1.0</b>  | 24.0                 | 27.0      | <b>3.1</b>  |

**eTable 2.** Multivariable Model of Factors Associated with Emergency Department Advanced Imaging Studies

|                              | Any advanced imaging (aOR) | CT (aOR)          | US (aOR)          | MRI (aOR)            |  |
|------------------------------|----------------------------|-------------------|-------------------|----------------------|--|
| Age in years                 |                            |                   |                   |                      |  |
| <1                           | Ref                        | Ref               | Ref               | Ref                  |  |
| 1-4                          | 0.63 (0.63, 0.64)          | 1.06 (1.05, 1.07) | 0.60 (0.60, 0.60) | 1.17 (1.14, 1.20)    |  |
| 5-12                         | 1.23 (1.23, 1.24)          | 1.96 (1.95, 1.98) | 1.15 (1.15, 1.16) | 2.47 (2.43, 2.52)    |  |
| 13-17                        | 2.11 (2.10, 2.12)          | 3.19 (3.17, 3.22) | 1.77 (1.76, 1.78) | 3.77 (3.69, 3.85)    |  |
| Sex, male                    | 1.08 (1.08, 1.08)          | 1.17 (1.17, 1.18) | 0.98 (0.98, 0.98) | 0.96 (0.95, 0.97)    |  |
| Race/Ethnicity               |                            |                   |                   |                      |  |
| Non-Hispanic White           | Ref                        | Ref               | Ref               | Ref                  |  |
| Non-Hispanic Black           | 0.50 (0.50, 0.51)          | 0.63 (0.63, 0.64) | 0.55 (0.54, 0.55) | 0.61 (0.60, 0.62)    |  |
| Hispanic                     | 0.73 (0.73, 0.73)          | 0.75 (0.75, 0.76) | 0.87 (0.87, 0.88) | 0.69 (0.67, 0.70)    |  |
| Other                        | 0.78 (0.77, 0.78)          | 0.83 (0.82, 0.84) | 0.84 (0.84, 0.85) | 0.85 (0.83, 0.87)    |  |
| Complex chronic condition(s) | 3.20 (3.19, 3.21)          | 1.63 (1.62, 1.64) | 1.19 (1.18, 1.20) | 2.20 (2.17, 2.23)    |  |
| Insurance                    |                            |                   |                   |                      |  |
| Public                       | Ref                        | Ref               | Ref               | Ref                  |  |
| Private                      | 1.36 (1.35, 1.36)          | 1.27 (1.26, 1.27) | 1.26 (1.25, 1.27) | 1.26 (1.24, 1.28)    |  |
| Other                        | 0.97 (0.96, 0.98)          | 1.08 (1.07, 1.1)  | 0.99 (0.98, 0.99) | 1.06 (1.03, 1.09)    |  |
| Disposition                  |                            |                   |                   |                      |  |
| Discharged                   | Ref                        | Ref               | Ref               | Ref                  |  |
| Inpatient admission          | 4.98 (4.97, 5.00)          | 4.34 (4.32, 4.36) | 4.47 (4.45, 4.49) | 13.75 (13.60, 13.93) |  |
| Transferred                  | 0.71 (0.69, 0.73)          | 0.97 (0.94, 1.00) | 0.57 (0.55, 0.59) | 0.81 (0.72, 0.91)    |  |
| Died                         | 0.97 (0.84, 1.12)          | 1.52 (1.28, 1.8)  | 0.56 (0.43, 0.72) | 0.17 (0.02, 1.12)    |  |
| Other                        | 0.71 (0.70, 0.72)          | 0.72 (0.7, 0.73)  | 0.74 (0.73, 0.75) | 1.25(1.18, 1.33)     |  |

|                |                   |                      |                      |                      |  |
|----------------|-------------------|----------------------|----------------------|----------------------|--|
| Census region  |                   |                      |                      |                      |  |
| Midwest        | 0.89 (0.88, 0.91) | 0.75 (0.55, 1.02)    | 1.14 (1.11, 1.16)    | 0.85 (0.54, 1.36)    |  |
| Northeast      | 0.98 (0.97, 0.99) | 0.78 (0.51, 1.19)    | 1.64 (1.60, 1.67)    | 1.43 (0.76, 2.69)    |  |
| South          | 1.16 (1.14, 1.17) | 1.19 (0.89, 1.57)    | 1.71 (1.68, 1.74)    | 1.03 (0.68, 1.57)    |  |
| West           | Ref               | Ref                  | Ref                  | Ref                  |  |
| Pre-2014 Year  | 1.01 (1.01, 1.01) | 0.917 (0.915, 0.919) | 1.102 (1.100, 1.104) | 1.057 (1.052, 1.061) |  |
| Post-2014 Year | 1.06 (1.06, 1.06) | 1.005 (1.003, 1.007) | 1.085 (1.083, 1.087) | 1.058 (1.053, 1.063) |  |

aOR= adjusted odds ratio

**eTable 3.** Frequency of Advanced Imaging, Admission, and Proportions of Total ED Visits for the 8 APR-DRGs

| APR-DRG                                                                                                 | ED visits    |              |          | Admitted |        |          | CT     |        |          | US     |        |          | MRI    |        |          |
|---------------------------------------------------------------------------------------------------------|--------------|--------------|----------|----------|--------|----------|--------|--------|----------|--------|--------|----------|--------|--------|----------|
|                                                                                                         | 2009 % total | 2018 % total | % change | 2009 %   | 2018 % | % change | 2009 % | 2018 % | % change | 2009 % | 2018 % | % change | 2009 % | 2018 % | % change |
| Abdominal pain (n = 663,925)                                                                            | 2.1          | 2.7          | 0.7      | 5.9      | 3.8    | -2.2     | 11.1   | 5.0    | -6.1     | 19.0   | 39.2   | 20.3     | 0.0    | 0.6    | 0.6      |
| Appendectomy (n = 104,787)                                                                              | 0.4          | 0.4          | 0.0      | 99.5     | 97.2   | -2.3     | 28.4   | 13.5   | -14.9    | 32.9   | 75.4   | 42.5     | 0.0    | 1.4    | 1.4      |
| Concussion, closed skull fracture, uncomplicated intracranial injury, coma <1h or no coma (n = 191,044) | 0.5          | 0.7          | 0.2      | 20.1     | 10.5   | -9.6     | 58.3   | 35.3   | -23.0    | 0.2    | 0.7    | 0.5      | 0.7    | 1.2    | 0.5      |
| Migraine & other headaches (n = 367,863)                                                                | 1.2          | 1.4          | 0.3      | 7.6      | 8.1    | 0.4      | 27.0   | 14.7   | -12.4    | 0.6    | 1.8    | 1.2      | 2.9    | 5.5    | 2.6      |
| Other disorders of nervous system (n = 88,095)                                                          | 0.3          | 0.4          | 0.1      | 26.5     | 25.6   | -0.8     | 22.5   | 12.4   | -10.1    | 2.3    | 4.8    | 2.5      | 8.6    | 11.4   | 2.8      |
| Other ear, nose, mouth, throat & cranial/facial diagnoses (n = 1,055,095)                               | 3.9          | 3.9          | 0.0      | 2.5      | 2.0    | -0.5     | 13.3   | 7.4    | -5.9     | 0.3    | 2.0    | 1.7      | 0.1    | 0.3    | 0.1      |
| Seizure (n = 368,515)                                                                                   | 1.5          | 1.4          | -0.1     | 27.1     | 29.5   | 2.4      | 16.5   | 11.3   | -5.3     | 0.7    | 1.7    | 1.0      | 3.1    | 3.8    | 0.7      |
| Ventricular shunt procedures (n = 14,765)                                                               | 0.1          | 0.0          | 0.0      | 99.6     | 100.0  | 0.4      | 77.8   | 64.5   | -13.3    | 8.7    | 13.5   | 4.8      | 9.9    | 27.8   | 17.9     |

**eTable 4.** Ten Most Frequent ICD-9 and ICD-10 Codes as Principal Diagnosis for the 8 APR-DRGs

| APR-DRG        | Principal diagnosis code (ICD9 or ICD10) | Description                          | Count  |
|----------------|------------------------------------------|--------------------------------------|--------|
| Abdominal Pain | 78900                                    | Abdominal pain, unspecified site     | 214429 |
|                | R109                                     | Unspecified abdominal pain           | 78805  |
|                | 78909                                    | Abdominal pain, other specified site | 55448  |
|                | 78903                                    | Abdominal pain, right lower quadrant | 44349  |
|                | R1031                                    | Right lower quadrant pain            | 36676  |
|                | R1084                                    | Generalized abdominal pain           | 36511  |
|                | 78906                                    | Abdominal pain, epigastric           | 25800  |

|                     |       |                                                                                     |       |
|---------------------|-------|-------------------------------------------------------------------------------------|-------|
|                     | 78905 | Abdominal pain, periumbilic                                                         | 23380 |
|                     | R1013 | Epigastric pain                                                                     | 22482 |
|                     | R1033 | Periumbilical pain                                                                  | 21494 |
|                     | 78907 | Abdominal pain, generalized                                                         | 20755 |
|                     | 78904 | Abdominal pain, left lower quadrant                                                 | 13005 |
|                     | R1032 | Left lower quadrant pain                                                            | 11115 |
|                     | 78901 | Abdominal pain, right upper quadrant                                                | 10988 |
|                     | R1030 | Lower abdominal pain, unspecified                                                   | 9722  |
|                     | R1011 | Right upper quadrant pain                                                           | 8616  |
|                     | 7897  | Colic                                                                               | 7986  |
|                     | 78902 | Abdominal pain, left upper quadrant                                                 | 6501  |
|                     | R1012 | Left upper quadrant pain                                                            | 5418  |
|                     | R1083 | Colic                                                                               | 4149  |
|                     |       |                                                                                     |       |
| <b>Appendectomy</b> | 5409  | Acute appendicitis without mention of peritonitis                                   | 44307 |
|                     | K3580 | Unspecified acute appendicitis                                                      | 18489 |
|                     | 5400  | Acute appendicitis with generalized peritonitis                                     | 15825 |
|                     | K352  | Acute appendicitis with generalized peritonitis                                     | 7431  |
|                     | K353  | Acute appendicitis with localized peritonitis                                       | 6727  |
|                     | 5401  | Acute appendicitis with peritoneal abscess                                          | 6095  |
|                     | 541   | Appendicitis, unqualified                                                           | 1049  |
|                     | K3589 | Other acute appendicitis                                                            | 840   |
|                     | K3532 | Acute appendicitis with localized peritonitis, without perforation or gangrene      | 503   |
|                     | K37   | Unspecified appendicitis                                                            | 437   |
|                     | 78903 | Abdominal pain, right lower quadrant                                                | 314   |
|                     | K3533 | Acute appendicitis with perforation and localized peritonitis, with abscess.        | 268   |
|                     | 5439  | Other and unspecified diseases of appendix                                          | 252   |
|                     | K3530 | Acute appendicitis with localized peritonitis, without perforation or gangrene.     | 248   |
|                     | 542   | Other appendicitis                                                                  | 159   |
|                     | K3520 | Acute appendicitis with generalized peritonitis, without abscess                    | 129   |
|                     | 2892  | Nonspecific mesenteric lymphadenitis                                                | 125   |
|                     | K36   | Other appendicitis                                                                  | 114   |
|                     | 78900 | Abdominal pain, unspecified site                                                    | 62    |
|                     | 56081 | Intestinal or peritoneal adhesions with obstruction (postoperative) (postinfection) | 54    |
|                     |       |                                                                                     |       |

|                                                                                                    |         |                                                                                                                                |       |
|----------------------------------------------------------------------------------------------------|---------|--------------------------------------------------------------------------------------------------------------------------------|-------|
| <b>Concussion,<br/>closed skull fx,<br/>uncomp IC<br/>injury, coma<br/>&lt;1 hr or no<br/>coma</b> | 8500    | Concussion with no loss of consciousness                                                                                       | 61326 |
|                                                                                                    | S060X0A | Concussion without loss of consciousness, initial encounter                                                                    | 45827 |
|                                                                                                    | 8509    | Concussion, unspecified                                                                                                        | 18170 |
|                                                                                                    | 85011   | Concussion, with loss of consciousness of 30 minutes or less                                                                   | 14997 |
|                                                                                                    | 80001   | Closed fracture of vault of skull without mention of intracranial injury, with no loss of consciousness                        | 6728  |
|                                                                                                    | S060X1A | Concussion with loss of consciousness of 30 minutes or less, initial encounter                                                 | 6548  |
|                                                                                                    | 8505    | Concussion with loss of consciousness of unspecified duration                                                                  | 6535  |
|                                                                                                    | S060X9A | Concussion with loss of consciousness of unspecified duration, initial encounter                                               | 6190  |
|                                                                                                    | S020XXA | Fracture of vault of skull, initial encounter for closed fracture                                                              | 4819  |
|                                                                                                    | 80101   | Closed fracture of base of skull without mention of intracranial injury, with no loss of consciousness                         | 4417  |
|                                                                                                    | S069X1A | Unspecified intracranial injury with loss of consciousness of 30 minutes or less, initial encounter                            | 1705  |
|                                                                                                    | S069X9A | Unspecified intracranial injury with loss of consciousness of unspecified duration, initial encounter                          | 1463  |
|                                                                                                    | S0219XA | Other fracture of base of skull, initial encounter for closed fracture                                                         | 1177  |
|                                                                                                    | S02119A | Unspecified fracture of occiput, initial encounter for closed fracture                                                         | 1153  |
|                                                                                                    | 80000   | Closed fracture of vault of skull without mention of intracranial injury, with state of consciousness unspecified              | 1103  |
|                                                                                                    | 80301   | Other closed skull fracture without mention of intracranial injury, with no loss of consciousness                              | 1051  |
|                                                                                                    | 85401   | Intracranial injury of other and unspecified nature, without mention of open intracranial wound, with no loss of consciousness | 1016  |
|                                                                                                    | 80300   | Other closed skull fracture without mention of intracranial injury, with state of consciousness unspecified                    | 988   |

|                                       |         |                                                                                                                               |        |
|---------------------------------------|---------|-------------------------------------------------------------------------------------------------------------------------------|--------|
|                                       | S069X0A | Unspecified intracranial injury without loss of consciousness, initial encounter                                              | 715    |
|                                       | S0291XA | Unspecified fracture of skull, initial encounter for closed fracture                                                          | 538    |
|                                       |         |                                                                                                                               |        |
| <b>Migraine &amp; other headaches</b> | 7840    | Headache                                                                                                                      | 153853 |
|                                       | R51     | Headache                                                                                                                      | 77412  |
|                                       | 34690   | Migraine, unspecified, without mention of intractable migraine without mention of status migrainosus                          | 47248  |
|                                       | G43909  | Migraine, unspecified, not intractable, without status migrainosus                                                            | 20178  |
|                                       | 3102    | Postconcussion syndrome                                                                                                       | 7452   |
|                                       | G43009  | Migraine without aura, not intractable, without status migrainosus                                                            | 5110   |
|                                       | G43A0   | Cyclical vomiting, not intractable                                                                                            | 4553   |
|                                       | 34692   | Migraine, unspecified, without mention of intractable migraine with status migrainosus                                        | 3597   |
|                                       | G43901  | Migraine, unspecified, not intractable, with status migrainosus                                                               | 3317   |
|                                       | F0781   | Postconcussional syndrome                                                                                                     | 3138   |
|                                       | G43109  | Migraine with aura, not intractable, without status migrainosus                                                               | 3006   |
|                                       | G44209  | Tension-type headache, unspecified, not intractable                                                                           | 2994   |
|                                       | 34600   | Migraine with aura, without mention of intractable migraine without mention of status migrainosus                             | 2465   |
|                                       | 30781   | Tension headache                                                                                                              | 2294   |
|                                       | G43809  | Other migraine, not intractable, without status migrainosus                                                                   | 2110   |
|                                       | G43001  | Migraine without aura, not intractable, with status migrainosus                                                               | 2047   |
|                                       | 34680   | Other forms of migraine, without mention of intractable migraine without mention of status migrainosus                        | 1752   |
|                                       | 34620   | Variants of migraine, not elsewhere classified, without mention of intractable migraine without mention of status migrainosus | 1489   |
|                                       | 3490    | Reaction to spinal or lumbar puncture                                                                                         | 1480   |



|                                                                       |         |                                                                                                      |        |
|-----------------------------------------------------------------------|---------|------------------------------------------------------------------------------------------------------|--------|
|                                                                       | 34610   | Migraine without aura, without mention of intractable migraine without mention of status migrainosus | 1333   |
|                                                                       |         |                                                                                                      |        |
| <b>Other disorders of the nervous system</b>                          | 7810    | Abnormal involuntary movements                                                                       | 15489  |
|                                                                       | 7812    | Abnormality of gait                                                                                  | 9075   |
|                                                                       | 7820    | Disturbance of skin sensation                                                                        | 5608   |
|                                                                       | R259    | Unspecified abnormal involuntary movements                                                           | 4186   |
|                                                                       | R2689   | Other abnormalities of gait and mobility                                                             | 3861   |
|                                                                       | 30720   | Tic disorder, unspecified                                                                            | 2989   |
|                                                                       | 7813    | Lack of coordination                                                                                 | 2118   |
|                                                                       | 3482    | Benign intracranial hypertension                                                                     | 1978   |
|                                                                       | R251    | Tremor, unspecified                                                                                  | 1957   |
|                                                                       | R258    | Other abnormal involuntary movements                                                                 | 1932   |
|                                                                       | R269    | Unspecified abnormalities of gait and mobility                                                       | 1835   |
|                                                                       | 78199   | Other symptoms involving nervous and musculoskeletal systems                                         | 1716   |
|                                                                       | 3332    | Myoclonus                                                                                            | 1656   |
|                                                                       | R200    | Anesthesia of skin                                                                                   | 1560   |
|                                                                       | F959    | Tic disorder, unspecified                                                                            | 1437   |
|                                                                       | 9962    | Mechanical complication of nervous system device, implant, and graft                                 | 1267   |
|                                                                       | R202    | Paresthesia of skin                                                                                  | 1243   |
|                                                                       | G932    | Benign intracranial hypertension                                                                     | 1124   |
|                                                                       | G253    | Myoclonus                                                                                            | 912    |
|                                                                       | 37700   | Papilledema, unspecified                                                                             | 534    |
|                                                                       |         |                                                                                                      |        |
| <b>Other ear, nose, mouth, throat, &amp; cranial/facial diagnoses</b> | 95901   | Head injury, unspecified                                                                             | 249776 |
|                                                                       | S0990XA | Unspecified injury of head, initial encounter                                                        | 11810  |
|                                                                       | 47819   | Other disease of nasal cavity and sinuses                                                            | 56550  |
|                                                                       | 38870   | Otalgia, unspecified                                                                                 | 56358  |
|                                                                       | 95909   | Injury of face and neck                                                                              | 49954  |
|                                                                       | 38010   | Infective otitis externa, unspecified                                                                | 43970  |
|                                                                       | 7847    | Epistaxis                                                                                            | 43728  |
|                                                                       | 931     | Foreign body in ear                                                                                  | 33722  |
|                                                                       | 932     | Foreign body in nose                                                                                 | 33347  |
|                                                                       | R0981   | Nasal congestion                                                                                     | 29660  |
|                                                                       | R040    | Epistaxis                                                                                            | 23909  |
|                                                                       | T171XXA | Foreign body in nostril, initial encounter                                                           | 16763  |
|                                                                       | S0993XA | Unspecified injury of face, initial encounter                                                        | 13713  |

|                |         |                                                                                                                                                |       |
|----------------|---------|------------------------------------------------------------------------------------------------------------------------------------------------|-------|
|                | 78499   | Other symptoms involving head and neck                                                                                                         | 12732 |
|                | 3804    | Impacted cerumen                                                                                                                               | 10784 |
|                | H2901   | Otalgia, right ear                                                                                                                             | 10098 |
|                | T161XXA | Foreign body in right ear, initial encounter                                                                                                   | 9884  |
|                | H9202   | Otalgia, left ear                                                                                                                              | 9024  |
|                | T162XXA | Foreign body in left ear, initial encounter                                                                                                    | 7620  |
|                | H9203   | Otalgia, bilateral                                                                                                                             | 7502  |
|                |         |                                                                                                                                                |       |
| <b>Seizure</b> | 78039   | Other convulsions                                                                                                                              | 82278 |
|                | 78031   | Febrile convulsions (simple), unspecified                                                                                                      | 70001 |
|                | 34590   | Epilepsy, unspecified, without mention of intractable epilepsy                                                                                 | 39088 |
|                | R569    | Unspecified convulsions                                                                                                                        | 36867 |
|                | R5600   | Simple febrile convulsions                                                                                                                     | 32337 |
|                | G40909  | Epilepsy, unspecified, not intractable, without status epilepticus                                                                             | 19944 |
|                | 3453    | Grand mal status                                                                                                                               | 10226 |
|                | 78032   | Complex febrile convulsions                                                                                                                    | 7637  |
|                | 34510   | Generalized convulsive epilepsy, without mention of intractable epilepsy                                                                       | 7244  |
|                | R5601   | Complex febrile convulsions                                                                                                                    | 5645  |
|                | G40409  | Other generalized epilepsy and epileptic syndromes, not intractable, without status epilepticus                                                | 4414  |
|                | G40919  | Epilepsy, unspecified, intractable, without status epilepticus                                                                                 | 4366  |
|                | 34591   | Epilepsy, unspecified, with intractable epilepsy                                                                                               | 4357  |
|                | 34550   | Localization-related (focal) (partial) epilepsy and epileptic syndromes with simple partial seizures, without mention of intractable epilepsy  | 3877  |
|                | 34540   | Localization-related (focal) (partial) epilepsy and epileptic syndromes with complex partial seizures, without mention of intractable epilepsy | 3813  |
|                | G40901  | Epilepsy, unspecified, not intractable, with status epilepticus                                                                                | 3549  |
|                | 34580   | Other forms of epilepsy and recurrent seizures, without mention of intractable epilepsy                                                        | 3009  |
|                | G40109  | Localization-related (focal) (partial) symptomatic epilepsy and epileptic                                                                      | 2222  |

|                                     |         |                                                                                                                                                                |      |
|-------------------------------------|---------|----------------------------------------------------------------------------------------------------------------------------------------------------------------|------|
|                                     |         | syndromes with simple partial seizures, not intractable, without status epilepticus                                                                            |      |
|                                     | G40209  | Localization-related (focal) (partial) symptomatic epilepsy and epileptic syndromes with complex partial seizures, not intractable, without status epilepticus | 2090 |
|                                     | G4089   | Other seizures                                                                                                                                                 | 1705 |
| <b>Ventricular shunt procedures</b> | 9962    | Mechanical complication of nervous system device, implant, and graft                                                                                           | 7785 |
|                                     | T8501XA | Breakdown (mechanical) of ventricular intracranial (communicating) shunt, initial encounter                                                                    | 2101 |
|                                     | 3314    | Obstructive hydrocephalus                                                                                                                                      | 831  |
|                                     | T8509XA | Other mechanical complication of ventricular intracranial (communicating) shunt, initial encounter                                                             | 738  |
|                                     | 99663   | Infection and inflammatory reaction due to nervous system device, implant, and graft                                                                           | 647  |
|                                     | 99675   | Other complications due to nervous system device, implant, and graft                                                                                           | 546  |
|                                     | 7423    | Congenital hydrocephalus                                                                                                                                       | 218  |
|                                     | G919    | Hydrocephalus, unspecified                                                                                                                                     | 154  |
|                                     | G911    | Obstructive hydrocephalus                                                                                                                                      | 137  |
|                                     | 3313    | Communicating hydrocephalus                                                                                                                                    | 111  |
|                                     | 99709   | Other nervous system complications                                                                                                                             | 69   |
|                                     | G910    | Communicating hydrocephalus                                                                                                                                    | 68   |
|                                     | Q039    | Congenital hydrocephalus, unspecified                                                                                                                          | 61   |
|                                     | T8502XA | Displacement of ventricular intracranial (communicating) shunt, initial encounter                                                                              | 56   |
|                                     | 3480    | Cerebral cysts                                                                                                                                                 | 54   |
|                                     | 1917    | Malignant neoplasm of brain stem                                                                                                                               | 51   |
|                                     | 4321    | Subdural hemorrhage                                                                                                                                            | 50   |
|                                     | G918    | Other hydrocephalus                                                                                                                                            | 26   |
|                                     | G9782   | Other postprocedural complications and disorders of nervous system                                                                                             | 26   |
|                                     | Q030    | Malformations of aqueduct of Sylvius                                                                                                                           | 21   |

**eTable 5-** Multivariable Model of Factors Associated with Secondary Outcome Measures for the 8 APR-DRGs

|                              | ED LOS (aRR)         | Admit (aOR)          | 3 Day ED Revisit (aOR) |
|------------------------------|----------------------|----------------------|------------------------|
| Age in years                 |                      |                      |                        |
| <1                           | Ref                  | Ref                  | Ref                    |
| 2-4                          | 0.94 (0.94, 0.95)    | 0.41 (0.41, 0.42)    | 0.80 (0.79, 0.82)      |
| 5-12                         | 0.97 (0.97, 0.98)    | 0.35 (0.34, 0.36)    | 0.72 (0.70, 0.74)      |
| 13-17                        | 1.11 (1.11, 1.11)    | 0.37 (0.36, 0.38)    | 0.72 (0.70, 0.73)      |
| Sex, male                    | 0.96 (0.96, 0.97)    | 0.91 (0.9, 0.92)     | 1.00 (0.99, 1.02)      |
| Race/Ethnicity               |                      |                      |                        |
| Non-Hispanic White           | Ref                  | Ref                  | Ref                    |
| Non-Hispanic Black           | 0.95 (0.95, 0.95)    | 0.68 (0.67, 0.69)    | 0.92 (0.91, 0.94)      |
| Hispanic                     | 0.98 (0.97, 0.98)    | 0.71 (0.7, 0.72)     | 1.00 (0.99, 1.02)      |
| Other                        | 0.98 (0.97, 0.98)    | 0.82 (0.8, 0.83)     | 0.87 (0.85, 0.89)      |
| Complex chronic condition(s) | 1.08 (1.07, 1.08)    | 1.59 (1.57, 1.62)    | 1.18 (1.13, 1.22)      |
| Insurance                    |                      |                      |                        |
| Public                       | Ref                  | Ref                  | Ref                    |
| Private                      | 1 (1, 1)             | 1.07 (1.06, 1.08)    | 0.96 (0.95, 0.98)      |
| Other                        | 1 (1, 1.01)          | 0.77 (0.75, 0.79)    | 0.79 (0.77, 0.82)      |
| Disposition                  |                      |                      |                        |
| Discharged                   | Ref                  | -                    | -                      |
| Inpatient admission          | -                    | -                    | -                      |
| Transferred                  | 0.81 (0.8, 0.81)     | -                    | -                      |
| Died                         | 1.5 (1.36, 1.65)     | -                    | -                      |
| Other                        | 1.07 (1.06, 1.08)    | -                    | -                      |
| Census region                |                      |                      |                        |
| Midwest                      | 0.87 (0.77, 1)       | 1.01 (0.7, 1.44)     | 1.14 (1.13, 1.16)      |
| Northeast                    | 1.17 (0.97, 1.39)    | 1.75 (1.07, 2.85)    | 0.77 (0.75, 0.79)      |
| South                        | 1.06 (0.94, 1.2)     | 1.37 (0.99, 1.89)    | 0.79 (0.77, 0.80)      |
| West                         | Ref                  | Ref                  | Ref                    |
| Pre-2014 Year                | 0.996 (0.995, 0.996) | 0.997 (0.994, 1.001) | 0.990 (0.986, 0.994)   |
| Post-2014 Year               | 1.003 (1.003, 1.004) | 0.94 (0.94, 0.94)    | 0.979 (0.974, 0.985)   |
| CT                           | 1.43 (1.36, 1.51)    | 2.54 (2.51, 2.57)    | 1.07 (1.04, 1.09)      |
| US                           | 1.5 (1.42, 1.58)     | 3.23 (3.17, 3.3)     | 1.08 (1.05, 1.10)      |
| MRI                          | 1.77 (1.68, 1.87)    | 8.67 (8.46, 8.89)    | 2.26 (2.14, 2.39)      |

aRR= adjusted rate ratio  
aOR= adjusted odds ratio

**eFigure 1.** Hospital-Specific Changes in CT imaging Overall and for Each of the 8 APR-DRGs Comparing 2009-2013 to 2014-2018

| Hospital | Overall                       |        | Abdominal Pain | Appendectomy | Concussion <sup>a</sup> | Migraine <sup>b</sup> | Other nervous system disorders | Other ENT/cranial diagnoses <sup>c</sup> | Seizure | Ventricular Shunt <sup>d</sup> |
|----------|-------------------------------|--------|----------------|--------------|-------------------------|-----------------------|--------------------------------|------------------------------------------|---------|--------------------------------|
|          | Baseline CT rate <sup>e</sup> | Change | Change         | Change       | Change                  | Change                | Change                         | Change                                   | Change  | Change                         |
| 1        | 27.6                          | -10.6  | -7.5           | -1.3         | -19.8                   | -16.6                 | -15.2                          | -8.2                                     | -10.8   | -4.7                           |
| 2        | 25.6                          | -10.7  | -12.6          | -21.9        | -17.1                   | -11                   | -9.7                           | -6.7                                     | -6.9    | -21.3                          |
| 3        | 25.2                          | -8.9   | -14.2          | -16.1        | -18.5                   | -11.8                 | -9.7                           | -3.4                                     | -4.9    | -10.2                          |
| 4        | 24                            | -10.3  | -8.8           | -9.5         | -21.3                   | -11                   | -12                            | -9.6                                     | -4.7    | -16.9                          |
| 5        | 20.8                          | -4.3   | -1.8           | -8           | -3.6                    | -6.5                  | -5                             | -6.8                                     | 1.9     | -29.5                          |
| 6        | 20.6                          | -3.8   | -2.2           | -2.8         | -13.4                   | -11.9                 | -5.7                           | -3.3                                     | -2.4    | -2.9                           |
| 7        | 19.4                          | -0.9   | -1.1           | 11.7         | -6                      | -4.9                  | 1.3                            | -3.1                                     | 1.1     | 16.2                           |
| 8        | 18.9                          | -10    | -6.2           | -17          | -11.4                   | -19.7                 | -14.5                          | -8.7                                     | -9.7    | -24                            |
| 9        | 18.5                          | -3.2   | -1.9           | -7.5         | -2.6                    | -7.8                  | -4.5                           | -0.2                                     | -1.9    | 2.2                            |
| 10       | 18.4                          | -5.4   | -4.2           | -27.5        | -12.7                   | -6.9                  | -9.5                           | -3.3                                     | -3.8    | -32                            |
| 11       | 17                            | -5.3   | -4             | -15.4        | -14.3                   | -10.7                 | -5.1                           | -3.1                                     | -3.4    | -1                             |
| 12       | 17                            | -4.2   | -2.9           | -3           | -8.1                    | -3.5                  | -6.8                           | -2.6                                     | -0.7    | 3.6                            |
| 13       | 16.6                          | -4.3   | -1.3           | 0.1          | -13.7                   | -10                   | -8.4                           | -4.3                                     | -3.4    | -5.4                           |
| 14       | 16                            | -7.4   | -5.4           | -29.8        | -21.5                   | -9.2                  | -3.6                           | -3.1                                     | -3.9    | -5                             |
| 15       | 16                            | -4.2   | -2.6           | -7.1         | -14.1                   | -5.3                  | -0.7                           | -1.3                                     | 0.1     | 5.6                            |
| 16       | 15.3                          | -2.2   | 0.3            | -3.1         | -16.2                   | -2.9                  | -0.2                           | -3.1                                     | 0.9     | 14.5                           |
| 17       | 14.7                          | -3.3   | -0.6           | 2.8          | -9.8                    | -10.4                 | -10.8                          | -3.4                                     | -4.7    | 5.6                            |
| 18       | 14.6                          | -4.4   | -1.9           | -7.5         | -10.6                   | -8.1                  | -6                             | -2.7                                     | -6      | -14.1                          |
| 19       | 14.2                          | -4.8   | -3.2           | -26.9        | -23.6                   | -9.5                  | -1.4                           | -2.7                                     | -2.6    | -10.6                          |
| 20       | 13.4                          | -5.7   | -2.2           | -8.3         | -7.3                    | -16.4                 | -8.8                           | -2.4                                     | -7.6    | -35.4                          |
| 21       | 13.2                          | -2.8   | -2.7           | -7.4         | -4.9                    | -2.6                  | -1.8                           | -1.8                                     | -0.7    | -36.7                          |
| 22       | 12.8                          | -4.2   | -1.4           | -20.6        | -16.7                   | -6.1                  | 0                              | -1.1                                     | 2.5     | -11.5                          |
| 23       | 12.5                          | -0.5   | 0.7            | 7.1          | -6.8                    | -6.1                  | 1.9                            | -0.7                                     | 1.9     | -9.3                           |
| 24       | 12                            | -6.2   | -5.5           | -9           | -5.7                    | -9.2                  | -4.9                           | -3.9                                     | -3.5    | -33.8                          |
| 25       | 11.5                          | -3     | 0.3            | -1.5         | -12.4                   | -3.2                  | -4.7                           | -2.9                                     | -3      | 1                              |
| 26       | 11.2                          | -4.5   | -5.9           | -36.4        | -10.7                   | -3.5                  | -3.9                           | -2.1                                     | -2.7    | -28.1                          |
| 27       | 10.9                          | 1.4    | 1              | 1.2          | -4.7                    | -2                    | -4.7                           | 1.5                                      | -3.9    | -7                             |
| 28       | 10.3                          | -3.1   | -2             | -3.5         | -14.4                   | -4.2                  | -2.5                           | -2.6                                     | -2.9    | -2.6                           |
| 29       | 9.8                           | -1.4   | -0.9           | 0.4          | -6.4                    | -5.1                  | -0.6                           | -0.3                                     | -2.9    | -3.3                           |
| 30       | 9.7                           | -1.7   | -4.5           | -31.5        | -19.9                   | -2                    | -3.5                           | -0.9                                     | -1.3    | -39                            |
| 31       | 9.4                           | 0.2    | 1              | 0.8          | -0.7                    | -1.3                  | 0                              | 1.6                                      | -0.4    | 1.8                            |
| 32       | 8.3                           | -3.4   | -5             | -13.8        | -11.3                   | -3.7                  | -3.8                           | -1.3                                     | -2.9    | -12.6                          |

For each APR-DRG and overall, changes in CT rates comparing 2009-2013 to 2014-2018 are shaded according to their quartile, with darker shades corresponding to larger magnitude decreases (darkest to lightest shades: dark red→red→orange→yellow). Hospitals were ranked from largest to smallest baseline rate in CT imaging and shaded by quartile, with darker shades corresponding to larger baseline rates.

<sup>a</sup>Concussion, closed skull fracture, uncomplicated IC injury, coma <1 hour or no coma

<sup>b</sup>Migraine and other headaches

<sup>c</sup>Other ear, nose, mouth, throat, & cranial/facial diagnoses

<sup>d</sup>Ventricular shunt procedures

<sup>e</sup>Baseline CT rate indicates the rate of CT imaging during the 2009-2013 period across the 8 APR-DRGs. For this column, lower baseline values are indicated by the darker shading.

<sup>f</sup>The four EDs with consistent reductions in CT above the median decrease for each of the 8 APR-DRG.

**eFigure 2.** Trends in Secondary Outcome Measures 2009-2018 for the 8 DRGs

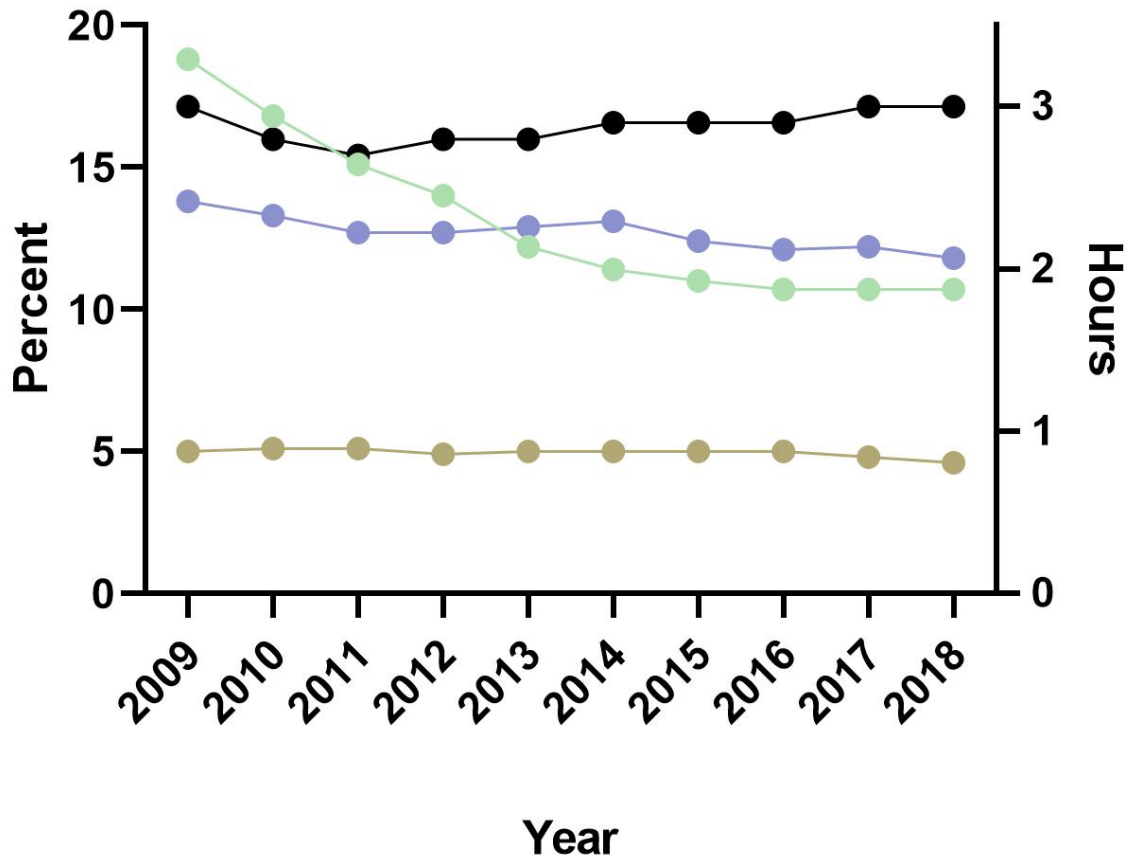

|                      | 2009 | 2018 | p, trend |
|----------------------|------|------|----------|
| CT (%)               | 18.8 | 10.7 | <.001    |
| Hospitalized (%)     | 13.8 | 11.8 | 0.036    |
| 3-day ED revisit (%) | 5.0  | 4.6  | 0.017    |
| ED LOS (hours)       | 3.0  | 3.0  | 0.742    |
